# Supplementary material for: Perceptions and experiences of a manual therapy trial: a qualitative study of people with moderate to severe COPD
Source: Springer Nature journal article supplement (doi:10.1186/s12998-021-00387-0), 2021-07-27
Supplement: MOESM1 [file 19396070]

## Additional File 1

Patient position during MET (a) seated and (b) side-lying.

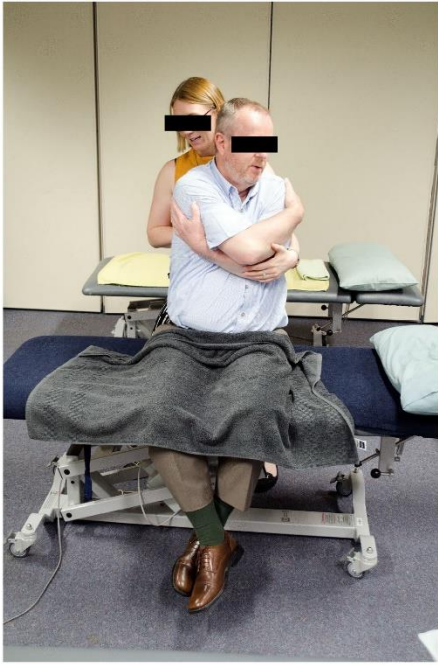

(a)

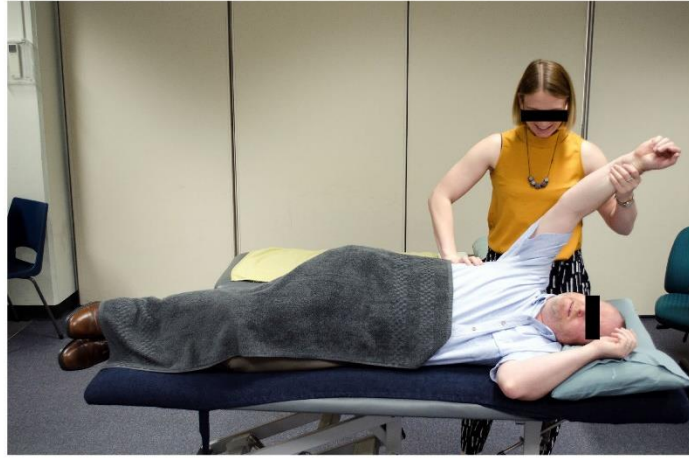

(b)
